1  
2  
3  
4  
5  
6  
7  
8  
9  
10  
11  
12  
13  
14  
15  
16  
17  
18  
19  
20  
21  
22  
23

MANUSCRIPT bioRxiv

Title: The feedstock microbiome selectively steers process stability during the anaerobic digestion of waste activated sludge

Running title: Feedstock inoculation of anaerobic digestion

**Cindy Ka Y Law, Rens De Henau, Jo De Vrieze**✉

Center for Microbial Ecology and Technology (CMET), Ghent University, Coupure Links 653, B-9000 Gent, Belgium

✉ Correspondence to: Jo De Vrieze, Ghent University; Faculty of Bioscience Engineering; Center for Microbial Ecology and Technology (CMET); Coupure Links 653; B-9000 Gent, Belgium; phone: +32 (0)9 264 59 76; fax: +32 (0)9 264 62 48; E-mail: Jo.DeVrieze@UGent.be; Webpage: [www.cmet.ugent.be](http://www.cmet.ugent.be).

24 **Abstract**

25 Strategies to enhance process performance of anaerobic digestion remain of key importance to  
26 achieve further spreading of this technology for integrated resource recovery from organic  
27 waste streams. Continuous inoculation of the microbial community in the digester *via* the  
28 feedstock could be such a cost-effective strategy. Here, anaerobic digestion of fresh waste  
29 activated sludge (WAS) was compared with sterilized WAS in response to two common process  
30 disturbances, *i.e.*, organic overloading and increasing levels of salts, to determine the  
31 importance of feedstock inoculation. A pulse in the organic loading rate severely impacted  
32 process performance of the digesters fed sterile WAS, with a  $92 \pm 45$  % decrease in methane  
33 production, compared to a  $42 \pm 31$  % increase in the digesters fed fresh WAS, relative to  
34 methane production before the pulse. Increasing salt pulses did not show a clear difference in  
35 process performance between the digesters fed fresh and sterile WAS, and process recovery  
36 was obtained even at the highest salt pulse of  $25 \text{ g Na}^+ \text{ L}^{-1}$ . Feedstock sterilisation strongly  
37 impacted the microbial community in the digesters. In conclusion, feedstock inoculation can be  
38 considered a cheap, yet, disturbance-specific strategy to enhance process stability in full-scale  
39 anaerobic digestion processes.

40

41 **Keywords:** Activated sludge, anaerobic digestion, biogas, methanogenesis, microbiome,  
42 resource recovery

43

## 44 **1. Introduction**

45 The increasing environmental pollution and energy insecurity are pressing issues in our present  
46 society, which makes it important to look for integrated strategies that provide a solution to  
47 both issues. The fossil resources around the world are being depleted at a tremendous velocity,  
48 *i.e.*, reaching a global total energy use of  $1.64 \times 10^5$  TWh in 2017 to which renewable sources  
49 only contributed 25% (Enerdate 2018). This makes a transition towards sustainable resources  
50 for materials and energy of key importance to halt the increase in CO<sub>2</sub> equivalents emissions  
51 and related climate change (De Meester et al. 2012; Hagos et al. 2017). Anaerobic digestion  
52 (AD) is a microbial process that can be one of the possible solutions for this problem. The  
53 number of full-scale AD plants is still increasing nowadays, even though it already exists for  
54 decades (Charnier et al. 2016). The success of AD lies in the fact that it does not only allow the  
55 stabilisation of organic waste streams, but it is also a key technology for the recovery of energy  
56 (Demitry 2016). The methanogenic archaea are the most critical microorganisms in the AD  
57 process, because they are responsible for the production of the energy-dense CH<sub>4</sub>, which can  
58 be used for electricity and heat production via a combined heat and power unit (Holm-Nielsen  
59 et al. 2009). However, these methanogens are most sensitive to suboptimal process conditions,  
60 *e.g.*, the presence of potential toxic compounds and organic overloading, and, hence, are  
61 susceptible to process failure (Appels et al. 2008). This sensitivity can in some cases prevent  
62 implantation of this technology (Demitry 2016).

63 One of the most common solution for preventing process failure is anaerobic co-digestion. Co-  
64 digestion can improve process stability, by (1) diluting potential inhibitory substances, such as  
65 ammonia toxicity, and (2) optimising the nutrient balance (Mata-Alvarez et al. 2011; Mata-  
66 Alvarez et al. 2000). Nevertheless, process stabilization and optimization remains difficult  
67 (Hubenov et al. 2015; Kacprzak et al. 2010), and the unbalanced availability of suitable  
68 feedstocks is another problem that hampers an efficient co-digestion process (Hagos et al.

69 2017).

70 Another strategy to improve process stability is bioaugmentation, whereby a specific  
71 consortium, either enriched or isolated from similar systems or obtained from other ecosystems,  
72 is added to enhance the desired activity (De Vrieze and Verstraete 2016; Schauer-Gimenez et  
73 al. 2010). These microorganisms can improve the start-up of new digesters (Saravanane et al.  
74 2001a; Saravanane et al. 2001b), reduce odour emissions (Duran et al. 2006; Tepe et al. 2008),  
75 and/or facilitate recovery of the reactors after an organic overload (Lynch et al. 1987). The  
76 disadvantage of this method is that it requires a certain volume of the biomass itself to be  
77 replaced, *i.e.*, 10 % or more, whereby it is often not cost-efficient (De Vrieze and Verstraete  
78 2016; Fotidis et al. 2014). Usually, only a temporal increase in CH<sub>4</sub> production can be observed,  
79 due to wash-out of the bioaugmented microorganism and/or possible competition with the  
80 indigenous microorganisms (Schauer-Gimenez et al. 2010).

81 The addition of cations is also an alternative to solve the problem of process stability. The  
82 influent often contains a suboptimal ratio of the most common cations, *i.e.*, Ca<sup>2+</sup>, Na<sup>+</sup>, K<sup>+</sup> and  
83 Mg<sup>2+</sup> (Kugelman and McCarty 1965). An imbalance of this ratio can cause inhibition of the  
84 methanogens, which leads to process failure. To prevent this occurrence, the addition of other  
85 cations can restore the optimal balance in the feedstock, and this should result in optimal  
86 conditions for the microorganisms (Appels et al. 2008; Kugelman and McCarty 1965). The  
87 downside of this approach is that these cations are costly, *i.e.*, the bulk market price of CaCl<sub>2</sub> is  
88 around € 150-250 ton<sup>-1</sup>, while the bulk market price of MgCl<sub>2</sub> ranges between € 250-300 ton<sup>-1</sup>  
89 (www.icis.com, consulted June 2019), and their addition to the feedstock will result in an  
90 increase in the conductivity, which can have an overall negative impact on the microbial  
91 community. Hence, preventing AD process failure *via* an economically feasible approach is a  
92 key aspect that requires further investigation before such a prevention strategy can be applied  
93 at the full scale. Such a strategy will further solidify the use of AD, which will result in a higher

94 sustainability in the use and recovery of the energy, combined with an environmental friendly  
95 way to treat organic waste streams (Chen et al. 2008).

96 The aim of this research was to tackle process failure in a cost-efficient manner by considering  
97 the importance of continuous inoculation or bio-augmentation through microorganisms in the  
98 feedstock. Two different process disturbances, *i.e.*, organic overloading and increasing levels  
99 of salts were considered, given the potential different impact of feedstock inoculation. We  
100 hypothesized that the microorganisms present in the feedstock can (1) support processes  
101 resistance against disturbances, and (2) enhance recovery following process inhibition.

## 102 2. Experimental procedures

### 103 2.1. Inoculum and feedstock

104 The inoculum for the operation of the lab-scale anaerobic digesters was obtained from the full-  
105 scale sludge digester of the wastewater treatment plant the Ossemeersen (Ghent, Belgium)  
106 (Table 1). The waste activated sludge (WAS) that was used as feedstock was also obtained from  
107 the Ossemeersen in two separate batches that were used in the first and second stage of the  
108 experiment, respectively (Table 2). The WAS was stored at 4°C until use.

109

### 110 2.2. Experimental design and operation

111 Six glass Schott bottles with a total volume of 1 L and a working volume of 800 mL were  
112 operated as lab-scale anaerobic digesters. The digesters were sealed with air-tight rubber  
113 stoppers, and connected to a water displacement system *via* gas-tight PVC tubing to monitor  
114 biogas production. The liquid in the water displacement system had a pH < 4.3 to avoid the CO<sub>2</sub>  
115 in the biogas from dissolving. Gas samples were collected *via* a Laboport<sup>®</sup> vacuum pump (KNF  
116 Group International, Aartselaar, Belgium) and glass sampling tube of 250 mL (Glasgerätebau  
117 Ochs, Lengler, Germany) for further analysis.

118 The digesters were operated in a semi-continuous stirred tank reactor mode, at mesophilic  
119 conditions in a temperature-controlled room at 34 ± 1°C. The reactors were initially filled to a  
120 total volume of 800 mL with inoculum, which was diluted with tap water to obtain an initial  
121 VSS (volatile suspended solids) concentration of 10 g L<sup>-1</sup>. The digesters were fed manually by  
122 briefly opening the digesters, three times a week with WAS. Three digesters (biological  
123 replicates) were fed fresh WAS, while the three other digesters (also biological replicates) were  
124 fed WAS that was autoclaved (30 min at 121 °C) twice (Table S1). This double autoclaving  
125 step, with an incubation period of 6-12 hours at room temperature between the two  
126 autoclaving steps, was included to ensure complete sterilisation of the sludge, including

127 spore-forming bacteria.

128 During the start-up phase (day 0-26), the organic loading rate (OLR) was slowly increased from  
129 0.94 to 3.75 g COD L<sup>-1</sup> d<sup>-1</sup> (chemical oxygen demand), and the hydraulic retention time was  
130 decreased from 40 to 10 days (Table 3). From day 27-126 on, an OLR of 3.75 g COD L<sup>-1</sup> d<sup>-1</sup>  
131 was maintained (WAS1), and between day 127-207, an OLR of 4.47 g COD L<sup>-1</sup> d<sup>-1</sup> was used  
132 (WAS2). The WAS1 was diluted with tap water in a 1:1 ratio to avoid overloading, while the  
133 WAS2 was used as such, because of the lower VS content. Glycerol was added on day 48 as a  
134 single additional pulse of 1 g COD L<sup>-1</sup> d<sup>-1</sup> to provoke organic overloading. Different pulses of  
135 NaCl were added on day 118 (6.25 g Na<sup>+</sup> L<sup>-1</sup>), day 160 (12.5 g Na<sup>+</sup> L<sup>-1</sup>) and day 188 (25 g Na<sup>+</sup>  
136 L<sup>-1</sup>).

137 The biogas production and composition were monitored three times a week, together with the  
138 pH and conductivity of each digester. Biogas production values were reported at standard  
139 temperature (273 K) and pressure (101325 Pa) conditions (STP). The sulphate, phosphate,  
140 sodium, total ammonium and volatile fatty acids (VFA) concentrations were measured on  
141 weekly basis. Samples for microbial community analysis were taken on day 0 (inoculum and  
142 WAS), 48, 118, 160, 188 and 207 from each digester, and stored at -20°C until DNA extraction  
143 was performed.

144

### 145 2.3. Microbial community analysis

146 The DNA extraction was carried out with the ZymoBIOMICS™ DNA Miniprep Kit (Zymo  
147 Research, Irvine, CA, USA), using a PowerLyzer® 24 Bench Top Bead-Based Homogenizer  
148 (MO BIO Laboratories, Inc, Carlsbad, CA, USA), in accordance with the instructions of the  
149 manufacturer. Agarose gel electrophoresis and PCR analysis were used to determine the quality  
150 of the DNA extracts. The PCR was carried out using the bacterial primers 341F (5'-  
151 CCTACGGGNGGCWGCAG) and 785Rmod (5'- GACTACHVGGGTATCTAAKCC),

152 targeting the V3-V4 region of the 16S rRNA gene, following an in-house PCR protocol (Boon  
153 et al. 2002; Klindworth et al. 2013). After quality validation, the DNA extracts were sent to  
154 BaseClear B.V., Leiden, The Netherlands, for Illumina amplicon sequencing of the bacterial  
155 community, using the abovementioned primers, on the MiSeq platform with V3 chemistry.  
156 Amplicon sequencing and data processing are described in detail in SI (S2). Real-time PCR  
157 analysis was carried out to quantify total bacteria, the methanogenic orders *Methanobacteriales*  
158 and *Methanomicrobiales*, and the methanogenic families *Methanosaetaceae* and  
159 *Methanosarcinaceae*, as described in SI (S3).

160

#### 161 2.4. Statistical analyses

162 Following the data processing of the amplicon sequencing data, a table was generated with the  
163 relative abundances of the different OTUs (operational taxonomic units) and their taxonomic  
164 assignment (Supplementary file 2) of each sample. Statistical analyses were carried out in R  
165 version 3.3.1 (<http://www.r-project.org>) (R Development Core Team 2013). The similarity of  
166 the bacterial community in biological replicates was statistically validated ( $P < 0.05$ ) using a  
167 repeated measures analysis of variance (ANOVA, *aov* function) (Connelly et al. 2017).  
168 Rescaling of the samples was carried out *via* the “common-scale” approach, by taking the  
169 proportions of all OTUs, multiplying them with the minimum sample size, and rounding them  
170 to the nearest integer (McMurdie and Holmes 2014). Rarefaction curves (Figure S1) were  
171 generated to estimate the degree of “coverage” of the bacterial community (Sanders 1968). The  
172 R packages *vegan* (Oksanen et al. 2016) and *phyloseq* (McMurdie and Holmes 2013) were used  
173 for bacterial community analysis.

174 Heatmaps were created at the Phylum, Order, Class, Family, and OTU level using the *pheatmap*  
175 function (*pheatmap* package) for which the biological replicates were collated as described  
176 earlier (Connelly et al. 2017). Significant differences in microbial community composition



177 between the digesters fed fresh and sterile WAS were identified by means of pair-wise  
178 Permutational ANOVA (PERMANOVA) with Bonferroni correction, using the *adonis* function  
179 (vegan). The order based Hill's numbers were used to evaluate the  $\alpha$ -diversity in the different  
180 digesters. These Hill's numbers represent richness (number of OTUs,  $H_0$ ), the exponential of  
181 the Shannon diversity index ( $H_1$ ) and the Inverse Simpson index ( $H_2$ ). Significant differences  
182 in  $\alpha$ -diversity between the digesters fed fresh and sterile WAS were determined with the  
183 Kruskal-Wallis rank sum test (*kruskal.test* function) (Hill 1973). Correlations between the  
184 sodium concentration and Hill's numbers were determined using the Kendall's tau correlation  
185 (*cor.test* function). The OTUs with a significant difference ( $P < 0.05$ ) in relative abundance  
186 between the digesters with fresh or sterilized WAS as feedstock were determined with the  
187 *DESeqDataSetFromMatrix* function from the DESeq2 package (Love et al. 2014).

188

## 189 2.5. Analytical techniques

190 Total solids (TS), total suspended solids (TSS), volatile suspended solids (VSS), volatile solids  
191 (VS), Kjeldahl nitrogen (TKN) and total COD were measured according to Standard Methods  
192 (Greenberg et al. 1992). Soluble COD was measured using Nanocolor COD1500 or 15000 test  
193 kits (Machery-Nagel, Düren, Germany), according to the manufacturer's instructions. The  
194 concentrations of  $\text{NH}_4^+$ ,  $\text{Na}^+$  and  $\text{K}^+$  were measured on a 761 Compact Ion Chromatograph  
195 (Metrohm, Herisau, Switzerland), which was equipped with a Metrosep C6-250/4.0 main  
196 column, a Metrosep C4 Guard/4.0 guard column and a conductivity detector. The eluent  
197 contained 1.7 mM  $\text{HNO}_3$  and 1.7 mM dipicolinic acid. Samples were centrifuged at 3000g for  
198 3 min with a Labofuge 400 Heraeus centrifuge (Thermo Fisher Scientific Inc, Merelbeke,  
199 Belgium), filtered over a 0.22  $\mu\text{m}$  filter (type PA-45/25, Macherey-Nagel, Germany) and  
200 diluted with Milli-Q water to reach the desired concentration range for quantification between  
201 1 and 100  $\text{mg L}^{-1}$ . The pH was measured with a C532 pH meter, and conductivity was

202 determined with a C833 conductivity meter (Consort, Turnhout, Belgium). The biogas  
203 composition was measured using a Compact Gas Chromatograph (Global Analyser Solutions,  
204 Breda, The Netherlands) (S5). The different VFA (C2-C8) were measured with a GC-2014 Gas  
205 Chromatograph (Shimadzu®, The Netherlands) (S6).

206

## 207 2.6. Data submission

208 The raw fastq files that served as a basis for the bacterial community analysis were deposited  
209 in the National Center for Biotechnology Information (NCBI) database (Accession number  
210 PRJNA540741).

211

## 212 3. Results

### 213 3.1. Digester performance

#### 214 3.1.1. The impact of an organic shock load

215 The initial start-up period during which the OLR was steadily increased and hydraulic retention  
216 time decreased (Table 3) over the first 27 days showed a steady increase in performance with  
217 increasing methane production rates (Figure 1). For the next 21 days, steady-state conditions  
218 were obtained in both digesters from day 27-47 (Figure 1), reflected in a stable methane  
219 production of  $157 \pm 33$  and  $316 \pm 30$  mL CH<sub>4</sub> L<sup>-1</sup> d<sup>-1</sup> in the digesters fed fresh and sterile WAS,  
220 respectively. The addition of glycerol caused a differential effect in the digesters fed fresh and  
221 sterile WAS. A methane production rate of  $224 \pm 10$  mL CH<sub>4</sub> L<sup>-1</sup> d<sup>-1</sup> was observed in the  
222 digesters fed fresh WAS on day 53, which is a  $42 \pm 31$  % increase compared to the previous 21  
223 days, because of the additional carbon source. In contrast, methane production decreased to  
224 only  $25 \pm 12$  mL CH<sub>4</sub> L<sup>-1</sup> d<sup>-1</sup> in the digesters fed sterile WAS, reflecting a  $92 \pm 45$  % decrease  
225 compared to the previous 21 days. This was also reflected in a pH value of  $7.16 \pm 0.03$  for the  
226 digesters fed fresh WAS, while the pH in the digesters fed sterile WAS decreased to  $6.68 \pm$   
227  $0.00$ . The recovery period was much longer for the digesters fed fresh WAS in comparison with  
228 the digesters fed sterile WAS. Methane production and pH in the digesters fed sterile WAS  
229 reached the same values as prior to the glycerol shock only on day 71, while for the digesters  
230 fed fresh WAS, complete recovery was already the case on day 53 (Figure 1 & 2). The residual  
231 VFA concentration also showed an increase following the glycerol pulse (Figure 2b). The  
232 increase in VFA production was a factor two higher for the digesters fed sterile WAS than for  
233 the digesters fed fresh WAS, *i.e.*, maximum concentrations of  $4.15 \pm 0.50$  g COD L<sup>-1</sup> (day 57)  
234 and  $1.96 \pm 0.13$  g COD L<sup>-1</sup> (day 50), respectively, were obtained (Figure 2b). Overall, more  
235 time was needed for the recovery of the digesters fed sterile WAS than for the digesters fed  
236 fresh WAS.

237

### 238 3.1.2. The impact of increasing salt pulses

239 After the addition of glycerol and stabilisation of the digesters to a new steady-state, NaCl was  
240 added as a novel disturbance. The increase in salt caused the increase in conductivity (Figure  
241 S2). The first pulse of  $6.25 \text{ g Na}^+ \text{ L}^{-1}$  on day 118 had only a limited, though clear influence on  
242 the methane production, pH and VFA, as a limited decrease in methane production could be  
243 observed in both digesters from day 120 on (Figure 1). A slight decrease in pH below the  
244 optimal value of 7.0 could be observed from day 120 on, but only in the digester fed fresh WAS  
245 (Figure 2a). In contrast, the residual VFA reached higher values in the digesters fed sterile WAS  
246 (Figure 2b), yet, total VFA did not exceed  $1 \text{ g COD L}^{-1}$ .

247 A second pulse of  $12.5 \text{ g Na}^+ \text{ L}^{-1}$  on day 160 resulted in a strong inhibition of the process, as  
248 reflected in a strong decrease in methane production and pH, and an increase in residual VFA.  
249 The methane production reached similar low values of  $52 \pm 5$  and  $58 \pm 6 \text{ mL CH}_4 \text{ L}^{-1} \text{ d}^{-1}$  on day  
250 162 for the digesters fed fresh and sterile WAS, respectively (Figure 1). However, the relative  
251 decrease in methane production was higher for the digesters fed sterile WAS ( $84 \pm 8 \%$ )  
252 compared to the digesters fed fresh WAS ( $76 \pm 8 \%$ ), due to the higher initial methane  
253 production in the digesters fed sterile WAS. The decrease in pH was stronger for the digesters  
254 fed fresh WAS (lowest value of  $6.50 \pm 0.02$  on day 165) than for the digester fed sterile WAS  
255 (lowest value of  $6.77 \pm 0.07$  on day 165), but the difference in pH between the steady-state  
256 values and the lowest value was the same for both digesters, *i.e.*, about 0.5 units (Figure 2a).  
257 The increase in residual VFA was similar for both digesters, with maximum values of  $2.59 \pm$   
258  $0.01$  and  $2.48 \pm 0.56 \text{ g COD L}^{-1}$  in the digesters fed fresh and sterile WAS, respectively (Figure  
259 2b). Complete recovery of both digesters was prior to the addition of the final pulse on day 188.  
260 The decrease in methane production and pH showed a similar trend as in response to the pulse  
261 of  $12.5 \text{ g Na}^+ \text{ L}^{-1}$  (Figure 1 & 2a). The decrease in pH was again stronger for the digesters fed

262 fresh WAS than for the digesters fed sterile WAS (Figure 2a). The increase in residual VFA was  
263 in this case slightly higher in the digester fed sterile WAS ( $3.27 \pm 0.44$  g COD L<sup>-1</sup> on day 195)  
264 than in the digester fed fresh WAS ( $2.52 \pm 0.03$  g COD L<sup>-1</sup> on day 195) (Figure 2b). However,  
265 similar to the previous NaCl pulses, process recovery took place, as can be observed in the  
266 increasing biogas and pH values (Figure 1 & 2a) and decreasing residual VFA (Figure 2b)  
267 towards the end of the experiment.

268

## 269 3.2. Microbial community composition and organization

### 270 3.2.1. Bacterial community

271 An average of  $13,774 \pm 2,770$  reads across all samples, representing  $1,488 \pm 520$  OTUs were  
272 obtained per sample (including singletons) following amplicon sequencing. Removal of  
273 singletons and normalisation according to the common-scale approach resulted in an average  
274 of  $9,182 \pm 327$  reads and  $648 \pm 240$  OTUs per sample. No significant differences (repeated  
275 measures ANOVA,  $P < 0.0001$ ) could be detected in the bacterial community composition  
276 between the biological replicates.

277 The bacterial community composition strongly differed between the digesters fed fresh and  
278 sterile WAS (PERMANOVA,  $P = 0.0001$ ), with 941 OTUs (21.7 % of all OTUs, reflecting  
279  $86.6 \pm 6.1$  % of the total relative abundance) showing a significant difference  
280 (*DESeqDataSetFromMatrix*,  $P < 0.05$ ) in relative abundance, irrespective of the salt  
281 concentration or time point. This difference was already clearly visible in the four main phyla,  
282 with the *Actinobacteria* ( $14.7 \pm 2.0$  vs.  $4.7 \pm 5.3$  %) and *Proteobacteria* ( $30.5 \pm 1.0$  vs.  $2.6 \pm$   
283  $2.5$  %) showing a higher relative abundance in the digesters fed fresh WAS, and the  
284 *Bacteroidetes* ( $25.9 \pm 5.6$  vs.  $16.3 \pm 2.7$  %) and *Firmicutes* ( $44.0 \pm 7.1$  vs.  $14.6 \pm 4.5$  %) showing  
285 a higher relative abundance in the digesters fed sterile WAS (Figure 3). This difference in  
286 bacterial community composition was also clear on the class, order, family, and OTU level

287 (Figure S3-S6). The  $\alpha$ -diversity analysis revealed a significantly higher richness  $H_0$  ( $P =$   
288 0.0025), and overall diversity  $H_1$  ( $P = 0.0015$ ) and  $H_2$  ( $P = 0.0015$ ) in the digesters fed fresh  
289 WAS, compared to the digesters fed sterile WAS (Figure 4).  
290 Even though the addition of glycerol and sodium impacted the overall methane production  
291 process, its direct effect on the bacterial community was limited. In total, 336 OTUs (7.7 % of  
292 all OTUs) showed a significant (*DESeqDataSetFromMatrix*,  $P < 0.05$ ) increase or decrease in  
293 function of the increasing sodium doses. Although the shift in relative abundance in response  
294 to the increased salinity could be detected for several dominant OTUs, such as OTU00004  
295 (unclassified *Rikenellaceae*) and OTU00007 (unclassified Bacterium) (Figure S6), this shift  
296 was not observed on the different phylogenetic levels (Figure 3 & S3-S5). A differential impact  
297 of the increased sodium concentration on  $\alpha$ -diversity could be observed between the digesters  
298 fed fresh and sterile WAS (Figure 4). For the digesters fed fresh WAS, a significant negative  
299 correlation was observed between the sodium concentration and  $H_0$  ( $\tau = -0.47$ ,  $P = 0.021$ ),  $H_1$   
300 ( $\tau = -0.69$ ,  $P = 0.0006$ ) and  $H_2$  ( $\tau = -0.67$ ,  $P = 0.0010$ ) diversity. In contrast, the increasing  
301 sodium concentration did not seem to impact the  $H_0$  ( $\tau = -0.06$ ,  $P = 0.77$ ),  $H_1$  ( $\tau = 0.11$ ,  $P =$   
302 0.55) and  $H_2$  ( $\tau = 0.31$ ,  $P = 0.11$ ) diversity in the digesters fed sterile WAS.

303

### 304 3.2.2. Methanogenic community

305 Real-time PCR analysis of the total bacteria and different methanogenic populations revealed  
306 a similar methanogens:bacteria ratio of  $0.42 \pm 0.23$  % across all digester samples, excluding the  
307 WAS samples. This indicates an overall strong dominance of the bacteria over the methanogens  
308 (at least a factor 100 higher absolute abundance) in the microbial community. No clear effect  
309 could be observed related to the feedstock sterilisation, although the methanogens:bacteria ratio  
310 appeared to be higher in the digesters fed sterile WAS, especially in response to the salt pulses  
311 (Figure S7). The methanogenic community in the two WAS batches was similar, with a

312 dominance of the *Methanosaetaceae*, and this was also the case for the Inoculum (Figure 5 and  
313 S8).

314 Overall, a significant difference (PERMANOVA,  $P = 0.0003$ ) in the methanogenic community  
315 profile could be observed between the digesters fed fresh and sterile WAS. After 48 days, prior  
316 to the addition of glycerol or sodium, a first divergence between the digesters with fresh and  
317 sterile WAS could be observed, with an increase in relative and absolute abundance of the  
318 *Methanosarcinaceae* in the digesters fed fresh WAS ( $13.6 \pm 1.9$  %), compared with the  
319 digesters fed sterile WAS ( $2.6 \pm 1.0$  %) (Figure 5). The first and only pulse of glycerol, prior  
320 to the addition of sodium (day 118), did not provoke a clear effect on the methanogenic  
321 community in the digesters fed fresh WAS. In contrast, the *Methanosarcinaceae* showed a clear  
322 increase in relative abundance ( $88.0 \pm 6.7$  %) on day 118 in the digesters fed sterile WAS,  
323 which was mainly due to the decrease in absolute abundance of the other methanogenic  
324 populations (Figure S8). This increase in relative and absolute abundance of the  
325 *Methanosarcinaceae* was maintained in the digesters fed sterile WAS in response to the  
326 increasing sodium pulses (day 160, 188 and 207). In contrast, even though the  
327 *Methanosarcinaceae* also increased in relative and absolute abundance in the digesters fed fresh  
328 WAS in response to the increasing sodium pulses, the *Methanomicrobiales* became dominant  
329 on day 188 and especially day 207, reaching a relative abundance of  $50.7 \pm 2.6$  %. The  
330 *Methanomicrobiales* became also more dominant in the digesters fed sterile WAS, though the  
331 *Methanosarcinaceae* remained their dominancy.

332

## 333 4. Discussion

334 Inoculation of the microbial community in anaerobic digestion *via* the feedstock, in this case  
335 waste activated sludge, resulted in a differentiating impact with respect to resistance to  
336 disturbances. The microbial community in the feedstock positively contributed resistance to  
337 organic overloading, in contrast to applying a sterile feedstock. However, a collapse in methane  
338 production in response to increasing salt pulses could not be prevented through feedstock  
339 inoculation, and process recovery took place irrespective of an active microbial community in  
340 the feedstock. Feedstock sterilisation strongly impacted the microbial community in the  
341 digesters in terms of composition and organisation.

342

343 4.1. Different disturbances have a differentiating effect on process stability in relation to  
344 feedstock inoculation

345 The addition of glycerol and salt showed a different impact on the activity of the microbial  
346 community. Glycerol that was added as an extra carbon source (Ma et al. 2008) can have two  
347 different effects on the process, which depends on the concentration, *i.e.*, (1) an increase in  
348 methane production or (2) process failure due to overloading (*Fountoulakis et al. 2010*;  
349 *González Arias et al. 2018*; *Holm-Nielsen et al. 2008*). The addition of salt will normally inhibit  
350 microbial activity (Appels et al. 2008), but in this research only a temporal effect on microbial  
351 activity and process performance could be observed. When glycerol was added into the  
352 digesters, the recovery of the digester fed fresh WAS was faster than for the digesters fed sterile  
353 WAS. The reason behind this difference could be related to the presence of an active microbial  
354 community in the WAS (Lebiocka et al. 2018; Li et al. 2018), while this was not the case for  
355 the digesters fed sterile WAS. The presence of the active community in the WAS feedstock  
356 contributed to the degradation of the organics, which led to an elevated methane production  
357 (*Fountoulakis et al. 2010*; *González Arias et al. 2018*). Instead of an elevated methane



358 production, a decrease was observed in the digesters fed sterile WAS, caused by the incremental  
359 organic loading because of glycerol addition. The microorganisms present in the digesters will  
360 quickly convert these organics into VFA, whereby the degradation of glycerol into VFA, mainly  
361 propionate and acetate, is faster than their subsequent conversion to methane. Hence, the  
362 methanogens could not keep up with the conversion rate of glycerol to VFA, which resulted in  
363 the accumulation of VFA (González Arias et al. 2018; Holm-Nielsen et al. 2008). This  
364 accumulation was confirmed by the pH decrease. Not only the addition of glycerol caused the  
365 accumulation of VFA, but also the sterilisation of the feed had an impact on the formation of  
366 VFA. The sterilisation of the influent resulted in an increase in the soluble COD fraction, as  
367 also reported earlier (Papadimitriou 2010), mainly due to the increase in VFA. The COD that  
368 normally was not biodegradable in the influent was partially converted into readily  
369 biodegradable COD, mainly VFA, because of the sterilisation process (Papadimitriou 2010;  
370 Tampio et al. 2014). Combined with the addition of glycerol, this resulted in an elevated organic  
371 loading, which led to the accumulation of VFA, and eventually to the inhibition of the  
372 microorganisms (Shi et al. 2017). Hence, the differential effect can be attributed to the presence  
373 of microbial community with a higher degree of activity in the fresh WAS and/or the increase  
374 in readily biodegradable COD in the sterile WAS.

375

#### 376 4.2. Process recovery takes place irrespective of increasing salt pulses

377 With the addition of salt, no extra COD was introduced into the digesters, but salt is known as  
378 a common inhibitor of microbial activity in AD (Chen et al. 2008; Rinzema et al. 1988; Zhang  
379 et al. 2017a). The addition of salt commonly has a stronger impact, by causing a higher osmotic  
380 imbalance, on the methanogenic archaea, in comparison to the bacterial community (Rinzema  
381 et al. 1988; Wang et al. 2017; Zhang et al. 2017b). Despite elevated concentrations of NaCl, the  
382 bacterial community remained active, whereby they still converted the organics into VFA. In

383 contrast, the salt concentration, especially at 12.5 and 25.0 g Na<sup>+</sup> L<sup>-1</sup>, temporarily ceased  
384 methanogenic activity, resulting into an accumulation of residual VFA (Appels et al. 2008;  
385 Chen et al. 2008). The inhibition was only temporarily, because the methanogens managed to  
386 recover following the decrease in salt (Feijoo et al. 1995; Hierholtzer and Akunna 2014; Ismail  
387 et al. 2010), which is reflected in the decrease of VFA, and increases in pH and methane  
388 production. Because of the rather low organic loading rate and limited biodegradability of the  
389 WAS, the VFA accumulation potential was low, and residual VFA increase and pH decrease  
390 remained limited in both cases. Therefore, based on the results of both disturbances, *i.e.*,  
391 glycerol and NaCl, it could be hypothesized that long-term inhibition in AD is not caused by  
392 the cations themselves, which only temporarily inhibit methanogenesis, but rather by the  
393 subsequent accumulation of VFA that permanently inhibit methanogenesis at higher organic  
394 loading rates (Mischopoulou et al. 2017; Zhang et al. 2017a). The similarity of both treatments  
395 demonstrates that the microorganisms in the feedstock apparently did not have an influence on  
396 the inhibition caused by salts. This indicates that process inhibition in AD is a consequence of  
397 a tilting balance in terms of VFA accumulation, as a consequence of another disturbance,  
398 resulting in a pH drop (Kugelman and McCarty 1965), rather than being directly caused by the  
399 disturbance. This hypothesis remains to be confirmed through other disturbances.

400

#### 401 4.3. Feedstock inoculation determines microbial community composition and organisation

402 The microbial community in AD, containing representatives from both the bacterial and  
403 archaeal domains of life, is determined by different parameters central to the performance of  
404 the process, including total and free ammonia, temperature, salinity and pH (De Vrieze et al.  
405 2018; De Vrieze et al. 2015b; Garcia and Angenent 2009; Westerholm and Schnürer 2019).  
406 This was also reflected in our study, as especially the addition of multiple salt pulses affected  
407 the bacterial and archaeal microbial community. However, this effect was clearly

408 overshadowed by the differential impact of using fresh vs. sterile WAS as feedstock. This  
409 observation emphasises the importance of the feedstock composition with respect to the  
410 microbial community on two levels. First, even though certain operational parameters, such as  
411 temperature and solids retention time, can be set by the operator, the feedstock composition  
412 determines the microbiome (Sundberg et al. 2013; Zhang et al. 2014), related to the  
413 abovementioned parameters. In our study, the impact of sterilisation of the feed, which also  
414 changed the WAS chemical composition, on the process itself at stable conditions was obvious,  
415 related to the increase in methane production, pH and residual VFA at steady-state conditions.  
416 Second, the influx of microorganisms can be a key factor that influences or even steers the AD  
417 process (Kirkegaard et al. 2017; Shin et al. 2019), as observed in our study in response to a  
418 glycerol pulse. Sterilisation through autoclaving, in addition to killing of all microorganisms,  
419 also should degrade DNA molecules into small fragments (20-30 base pairs), though some  
420 larger fragments can remain behind (Esser et al. 2006), especially related to the complex WAS  
421 matrix. The WAS contains a living active microbial community with both bacteria and  
422 methanogenic archaea, as demonstrated earlier (De Vrieze et al. 2015a), but also dead/inactive  
423 microorganisms and/or free DNA could be present, thus, influencing the microbial community  
424 profile (Kirkegaard et al. 2017). However, given (1) the presence of anaerobic sites in activated  
425 sludge units, reflected in diffuse methane emissions (Daelman et al. 2012), and (2) the  
426 importance of immigration in microbial community shaping (Sloan et al. 2006), the  
427 contribution of microorganisms in the WAS feedstock to process performance in AD is  
428 apparent, as confirmed by our results.

429 The impact of feedstock inoculation on the microbial community can be considered on different  
430 levels and across the domains of life. The strong difference in bacterial community composition  
431 already at the phylum level can be partially contributed directly to the WAS. For example, the  
432 digesters fed fresh WAS contained a higher relative abundance of Proteobacteria, thus,

433 reflecting the dominance of this phylum in the WAS itself. This was also reflected on the other  
434 phylogenetic levels. A similar result was obtained for the methanogenic community, because  
435 even though the absolute abundance of the methanogens in the WAS was up to a factor 10-100  
436 lower than in the digesters, the digesters fed fresh WAS showed a similar profile as the WAS  
437 itself during the first sampling points. The strong dominance of the *Methanosarcinaceae* in the  
438 digesters fed sterile WAS could be due to their high growth rate at higher residual VFA  
439 (Conklin et al. 2006) as r-strategist in a more “open” niche (De Vrieze et al. 2017; Pianka 1970)  
440 in contrast to the digesters fed fresh WAS, where there was a continuous inflow of  
441 methanogens. The dominance of fewer taxa in the more open niche of the digesters fed sterile  
442 WAS was also reflected in their significantly lower diversity, compared to the digesters fed  
443 fresh WAS. As higher overall diversity can be linked to a higher functional redundancy  
444 (Briones and Raskin 2003; Langer et al. 2015; McMahon et al. 2007; Venkiteshwaran et al.  
445 2016), this, at least partially, explains the higher resistance to the glycerol pulse of the digesters  
446 fed fresh WAS, compared to the digesters fed sterile WAS.

447

## 448 **5. Conclusions**

449 We demonstrated the importance of feedstock inoculation with respect to process performance  
450 and resistance towards disturbances in anaerobic digestion. A differential effect of feedstock  
451 inoculation was observed, as the microorganisms in the feedstock contributed to process  
452 stability in response to a glycerol pulse, while this was not the case for increasing salt pulses.  
453 Process recovery following the salt pulses took place irrespective of inoculation *via* the  
454 feedstock. Feedstock inoculation strongly determined the bacterial and archaeal community  
455 composition and organisation in the digesters, providing additional process stability security.  
456 Overall, this opens the need to consider feedstock inoculation with feedstocks rich in suitable  
457 microorganisms for anaerobic digestion, such as waste activated sludge and manure, for full-  
458 scale anaerobic digestion processes as a “right-of-the-shelf” strategy to enhance process  
459 stability.

460

461 **Acknowledgments**

462 Cindy Ka Y Law kindly acknowledges the support from the ELECTRA project “Electricity  
463 Driven Low Energy and Chemical Input Technology for Accelerated Bioremediation” financed  
464 by the H2020 of the European Commission under Grant number GA 826244. Jo De Vrieze is  
465 supported as postdoctoral fellow by the Research Foundation Flanders (FWO-Vlaanderen). The  
466 authors would like to thank Tim Lacoere for his contribution to the molecular analyses and  
467 Aquafin for their assistance with sample collection. We thank Pieter Candry and Karel Folens  
468 for critically reading the manuscript.

469

## 470 References

- 471 Anthonisen AC, Loehr RC, Prakasam TBS, Srinath EG (1976) Inhibition of Nitrification by  
472 Ammonia and Nitrous Acid. *Journal Water Pollution Control Federation* 48(5):835-852
- 473 Appels L, Baeyens J, Degève J, Dewil R (2008) Principles and potential of the anaerobic  
474 digestion of waste-activated sludge. *Progress in Energy and Combustion Science*  
475 34(6):755-781 doi:<https://doi.org/10.1016/j.pecs.2008.06.002>
- 476 Boon N, De Windt W, Verstraete W, Top EM (2002) Evaluation of nested PCR-DGGE  
477 (denaturing gradient gel electrophoresis) with group-specific 16S rRNA primers for the  
478 analysis of bacterial communities from different wastewater treatment plants. *FEMS*  
479 *Microbiol Ecol* 39(2):101-112 doi:10.1111/j.1574-6941.2002.tb00911.x
- 480 Briones A, Raskin L (2003) Diversity and dynamics of microbial communities in engineered  
481 environments and their implications for process stability. *Curr Opin Biotechnol*  
482 14(3):270-276 doi:10.1016/s0958-1669(03)00065-x
- 483 Charnier C, Latrille E, Lardon L, Miroux J, Steyer JP (2016) Combining pH and electrical  
484 conductivity measurements to improve titrimetric methods to determine ammonia  
485 nitrogen, volatile fatty acids and inorganic carbon concentrations. *Water Research*  
486 95:268-279 doi:<https://doi.org/10.1016/j.watres.2016.03.017>
- 487 Chen Y, Cheng JJ, Creamer KS (2008) Inhibition of anaerobic digestion process: A review.  
488 *Bioresource Technology* 99(10):4044-4064  
489 doi:<https://doi.org/10.1016/j.biortech.2007.01.057>
- 490 Conklin A, Stensel HD, Ferguson J (2006) Growth kinetics and competition between  
491 *Methanosarcina* and *Methanosaeta* in mesophilic anaerobic digestion. *Water Environ*  
492 *Res* 78(5):486-496 doi:10.2175/106143006x95393
- 493 Connelly S, Shin SG, Dillon RJ, Ijaz UZ, Quince C, Sloan WT, Collins G (2017) Bioreactor  
494 Scalability: Laboratory-Scale Bioreactor Design Influences Performance, Ecology, and  
495 Community Physiology in Expanded Granular Sludge Bed Bioreactors. *Front Microbiol*  
496 8:15 doi:10.3389/fmicb.2017.00664
- 497 Daelman MRJ, van Voorthuizen EM, van Dongen UGJM, Volcke EIP, van Loosdrecht MCM  
498 (2012) Methane emission during municipal wastewater treatment. *Water Res*  
499 46(11):3657-3670 doi:<https://doi.org/10.1016/j.watres.2012.04.024>
- 500 De Meester S, Demeyer J, Velghe F, Peene A, Van Langenhove H, Dewulf J (2012) The  
501 environmental sustainability of anaerobic digestion as a biomass valorization  
502 technology. *Bioresource Technology* 121:396-403  
503 doi:<https://doi.org/10.1016/j.biortech.2012.06.109>
- 504 De Vrieze J, Christiaens MER, Verstraete W (2017) The microbiome as engineering tool:  
505 Manufacturing and trading between microorganisms. *New Biotechnology* 39(Part  
506 B):206-214 doi:<https://doi.org/10.1016/j.nbt.2017.07.001>
- 507 De Vrieze J, Pinto AJ, Sloan WT, Ijaz UZ (2018) The active microbial community more  
508 accurately reflects the anaerobic digestion process: 16S rRNA (gene) sequencing as a  
509 predictive tool. *Microbiome* 6:13 doi:10.1186/s40168-018-0449-9
- 510 De Vrieze J, Raport L, Willems B, Verbrugge S, Volcke E, Meers E, Angenent LT, Boon N  
511 (2015a) Inoculum selection influences the biochemical methane potential of agro-  
512 industrial substrates. *Microb Biotechnol* 8(5):776-786 doi:10.1111/1751-7915.12268
- 513 De Vrieze J, Saunders AM, He Y, Fang J, Nielsen PH, Verstraete W, Boon N (2015b) Ammonia  
514 and temperature determine potential clustering in the anaerobic digestion microbiome.  
515 *Water Res* 75(0):312-323 doi:<http://dx.doi.org/10.1016/j.watres.2015.02.025>
- 516 De Vrieze J, Verstraete W (2016) Perspectives for microbial community composition in  
517 anaerobic digestion: from abundance and activity to connectivity. *Environ Microbiol*  
518 18(9):2797-2809 doi:10.1111/1462-2920.13437

- 519 Demitry ME (2016) Anaerobic Digestion Process Stability and the Extension of the ADM1 for  
520 Municipal Sludge Co- Digested with Bakery Waste.
- 521 Duran M, Tepe N, Yurtsever D, Punzi VL, Bruno C, Mehta RJ (2006) Bioaugmenting anaerobic  
522 digestion of biosolids with selected strains of *Bacillus*, *Pseudomonas*, and  
523 *Actinomyces* species for increased methanogenesis and odor control. Applied  
524 Microbiology and Biotechnology 73(4):960-966 doi:10.1007/s00253-006-0548-6
- 525 Enerdate (2018) Global Energy Statistical Yearbook 2018.
- 526 Esser DK-H, Marx DWH, Lisowsky PDT (2006) DNA Decontamination: Novel DNA-  
527 ExitusPlus™ in comparison with conventional reagents. BioTechniques 40(2):238-239  
528 doi:10.2144/06402af01
- 529 Feijoo G, Soto M, Méndez R, Lema JM (1995) Sodium inhibition in the anaerobic digestion  
530 process: Antagonism and adaptation phenomena. Enzyme and Microbial Technology  
531 17(2):180-188 doi:[https://doi.org/10.1016/0141-0229\(94\)00011-F](https://doi.org/10.1016/0141-0229(94)00011-F)
- 532 Fotidis IA, Wang H, Fiedel NR, Luo G, Karakashev DB, Angelidaki I (2014) Bioaugmentation  
533 as a Solution To Increase Methane Production from an Ammonia-Rich Substrate.  
534 Environmental Science & Technology 48(13):7669-7676 doi:10.1021/es5017075
- 535 Fountoulakis MS, Petousi I, Manios T (2010) Co-digestion of sewage sludge with glycerol to  
536 boost biogas production. Waste Manage 30(10):1849-1853  
537 doi:10.1016/j.wasman.2010.04.011
- 538 Garcia ML, Angenent LT (2009) Interaction between temperature and ammonia in mesophilic  
539 digesters for animal waste treatment. Water Res 43(9):2373-2382  
540 doi:10.1016/j.watres.2009.02.036
- 541 González Arias J, E. Sánchez M, Gómez X (2018) Enhancing Anaerobic Digestion: The Effect  
542 of Carbon Conductive Materials, vol 4,
- 543 Greenberg AE, Clesceri LS, Eaton AD (1992) Standard Methods for the Examination of Water  
544 and Wastewater American Public Health Association Publications, Washington.
- 545 Hagos K, Zong J, Li D, Liu C, Lu X (2017) Anaerobic co-digestion process for biogas  
546 production: Progress, challenges and perspectives. Renewable and Sustainable Energy  
547 Reviews 76:1485-1496 doi:<https://doi.org/10.1016/j.rser.2016.11.184>
- 548 Hierholtzer A, Akunna JC (2014) Modelling start-up performance of anaerobic digestion of  
549 saline-rich macro-algae. Water Science and Technology 69(10):2059-2065  
550 doi:10.2166/wst.2014.100
- 551 Hill MO (1973) Diversity and Evenness: A Unifying Notation and Its Consequences. Ecology  
552 54(2):427-432 doi:10.2307/1934352
- 553 Holm-Nielsen JB, Al Seadi T, Oleskowicz-Popiel P (2009) The future of anaerobic digestion  
554 and biogas utilization. Bioresour Technol 100(22):5478-5484  
555 doi:10.1016/j.biortech.2008.12.046
- 556 Holm-Nielsen JB, Lomborg CJ, Oleskowicz-Popiel P, Esbensen KH (2008) On-line near  
557 infrared monitoring of glycerol-boosted anaerobic digestion processes: Evaluation of  
558 process analytical technologies. Biotechnology and Bioengineering 99(2):302-313  
559 doi:10.1002/bit.21571
- 560 Hubenov V, N Mihaylova S, Simeonov I (2015) Anaerobic co-digestion of waste fruits and  
561 vegetables and swine manure in a pilot-scale bioreactor, vol 47,
- 562 Ismail SB, de La Parra CJ, Temmink H, van Lier JB (2010) Extracellular polymeric substances  
563 (EPS) in upflow anaerobic sludge blanket (UASB) reactors operated under high salinity  
564 conditions. Water Research 44(6):1909-1917  
565 doi:<https://doi.org/10.1016/j.watres.2009.11.039>
- 566 Kacprzak A, Krzystek L, Ledakowicz S (2010) Co-digestion of agricultural and industrial  
567 wastes. Chemical Papers 64(2):127-131 doi:10.2478/s11696-009-0108-5
- 568 Kirkegaard RH, McIlroy SJ, Kristensen JM, Nierychlo M, Karst SM, Dueholm MS, Albertsen



- 569 M, Nielsen PH (2017) The impact of immigration on microbial community composition  
570 in full-scale anaerobic digesters. *Sci Rep* 7:11 doi:10.1038/s41598-017-09303-0
- 571 Klindworth A, Pruesse E, Schweer T, Peplies J, Quast C, Horn M, Glockner FO (2013)  
572 Evaluation of general 16S ribosomal RNA gene PCR primers for classical and next-  
573 generation sequencing-based diversity studies. *Nucleic Acids Research* 41(1):11  
574 doi:10.1093/nar/gks808
- 575 Kugelman IJ, McCarty PL (1965) Cation Toxicity and Stimulation in Anaerobic Waste  
576 Treatment. *Journal (Water Pollution Control Federation)* 37(1):97-116
- 577 Langer SG, Ahmed S, Einfalt D, Bengelsdorf FR, Kazda M (2015) Functionally redundant but  
578 dissimilar microbial communities within biogas reactors treating maize silage in co-  
579 fermentation with sugar beet silage. *Microb Biotechnol* 8(5):828-836  
580 doi:10.1111/1751-7915.12308
- 581 Lebiocka M, Montusiewicz A, Cydzik-Kwiatkowska A (2018) Effect of Bioaugmentation on  
582 Biogas Yields and Kinetics in Anaerobic Digestion of Sewage Sludge. *Int J Environ*  
583 *Res Public Health* 15(8):1717 doi:10.3390/ijerph15081717
- 584 Li Y, Li L, Sun Y, Yuan Z (2018) Bioaugmentation strategy for enhancing anaerobic digestion  
585 of high C/N ratio feedstock with methanogenic enrichment culture. *Bioresource*  
586 *Technology* 261:188-195 doi:<https://doi.org/10.1016/j.biortech.2018.02.069>
- 587 Love MI, Huber W, Anders S (2014) Moderated estimation of fold change and dispersion for  
588 RNA-seq data with DESeq2. *Genome biology* 15(12):550-550 doi:10.1186/s13059-  
589 014-0550-8
- 590 Lynch N, Daniels L, Parkin GF (1987) Bioaugmentation of stressed anaerobic filters with  
591 methanogenic enrichment cultures.
- 592 Ma J, Van Wambeke M, Carballa M, Verstraete W (2008) Improvement of the anaerobic  
593 treatment of potato processing wastewater in a UASB reactor by co-digestion with  
594 glycerol, vol 30,
- 595 Mata-Alvarez J, Dosta J, Macé S, Astals S (2011) Codigestion of solid wastes: A review of its  
596 uses and perspectives including modeling. *Critical Reviews in Biotechnology* 31(2):99-  
597 111 doi:10.3109/07388551.2010.525496
- 598 Mata-Alvarez J, Mace S, Llabres P (2000) Anaerobic digestion of organic solid wastes. An  
599 overview of research achievements and perspectives. *Bioresour Technol* 74(1):3-16  
600 doi:10.1016/s0960-8524(00)00023-7
- 601 McMahan KD, Martin HG, Hugenholtz P (2007) Integrating ecology into biotechnology. *Curr*  
602 *Opin Biotechnol* 18(3):287-292 doi:<https://doi.org/10.1016/j.copbio.2007.04.007>
- 603 McMurdie PJ, Holmes S (2013) phyloseq: An R Package for Reproducible Interactive Analysis  
604 and Graphics of Microbiome Census Data. *PLoS One* 8(4):e61217  
605 doi:10.1371/journal.pone.0061217
- 606 McMurdie PJ, Holmes S (2014) Waste Not, Want Not: Why Rarefying Microbiome Data Is  
607 Inadmissible. *PLoS Comput Biol* 10(4):12 doi:10.1371/journal.pcbi.1003531
- 608 Mischopoulou M, Kalamaras SD, Naidis P, Kotsopoulos TA, Samaras P (2017) Start-up and  
609 steady-state results of a UASB reactor treating high pH baker's yeast molasses  
610 wastewater for methane production. *Journal of Chemical Technology & Biotechnology*  
611 92(4):775-780 doi:10.1002/jctb.5055
- 612 Oksanen J, Blanchet FG, Kindt R, Legendre P, Minchin PR, O'Hara R.B., Simpson GL,  
613 Solymos P, Stevens MHH, Wagner H (2016) Vegan: Community ecology package. R  
614 package version 2.3-4.,
- 615 Papadimitriou EK (2010) Hydrolysis of organic matter during autoclaving of commingled  
616 household waste. *Waste Management* 30(4):572-582  
617 doi:<https://doi.org/10.1016/j.wasman.2009.11.019>
- 618 Pianka ER (1970) On r- and K-Selection. *The American Naturalist* 104(940):592-597

- 619 R Development Core Team (2013) R: A Language and Environment for Statistical Computing.  
620 3.0 ed. Vienna, Austria: R Foundation for Statistical Computing.,  
621 Rinzema A, van Lier J, Lettinga G (1988) Sodium inhibition of acetoclastic methanogens in  
622 granular sludge from a UASB reactor. *Enzyme and Microbial Technology* 10(1):24-32  
623 doi:[https://doi.org/10.1016/0141-0229\(88\)90094-4](https://doi.org/10.1016/0141-0229(88)90094-4)  
624 Sanders HL (1968) Marine Benthic Diversity: A Comparative Study. *The American Naturalist*  
625 102(925):243-282 doi:10.1086/282541  
626 Saravanane R, Murthy DVS, Krishnaiah K (2001a) Bioaugmentation and anaerobic treatment  
627 of pharmaceutical effluent in fluidized bed reactor. *Journal of Environmental Science*  
628 *and Health, Part A* 36(5):779-791 doi:10.1081/ESE-100103760  
629 Saravanane R, Murthy DVS, Krishnaiah K (2001b) Bioaugmentation and treatment of  
630 cephalixin drug-based pharmaceutical effluent in an upflow anaerobic fluidized bed  
631 system. *Bioresource Technology* 76(3):279-281 doi:[https://doi.org/10.1016/S0960-](https://doi.org/10.1016/S0960-8524(00)00121-8)  
632 [8524\(00\)00121-8](https://doi.org/10.1016/S0960-8524(00)00121-8)  
633 Schauer-Gimenez AE, Zitomer DH, Maki JS, Struble CA (2010) Bioaugmentation for  
634 improved recovery of anaerobic digesters after toxicant exposure. *Water Research*  
635 44(12):3555-3564 doi:<https://doi.org/10.1016/j.watres.2010.03.037>  
636 Shi X, Lin J, Zuo J, Li P, Li X, Guo X (2017) Effects of free ammonia on volatile fatty acid  
637 accumulation and process performance in the anaerobic digestion of two typical bio-  
638 wastes. *Journal of Environmental Sciences* 55:49-57  
639 doi:<https://doi.org/10.1016/j.jes.2016.07.006>  
640 Shin J, Cho S-K, Lee J, Hwang K, Chung JW, Jang H-N, Shin SG (2019) Performance and  
641 Microbial Community Dynamics in Anaerobic Digestion of Waste Activated Sludge:  
642 Impact of Immigration. *Energies* 12(3):573  
643 Sloan WT, Lunn M, Woodcock S, Head IM, Nee S, Curtis TP (2006) Quantifying the roles of  
644 immigration and chance in shaping prokaryote community structure. *Environ Microbiol*  
645 8(4):732-740 doi:10.1111/j.1462-2920.2005.00956.x  
646 Sundberg C, Al-Soud WA, Larsson M, Alm E, Yekta SS, Svensson BH, Sørensen SJ, Karlsson  
647 A (2013) 454 pyrosequencing analyses of bacterial and archaeal richness in 21 full-scale  
648 biogas digesters. *FEMS Microbiol Ecol* 85(3):612-626 doi:10.1111/1574-6941.12148  
649 Tampio E, Ervasti S, Paavola T, Heaven S, Banks C, Rintala J (2014) Anaerobic digestion of  
650 autoclaved and untreated food waste. *Waste Management* 34(2):370-377  
651 doi:<https://doi.org/10.1016/j.wasman.2013.10.024>  
652 Tepe N, Yurtsever D, Duran M, Mehta RJ, Bruno C, Punzi VL (2008) Odor control during  
653 post-digestion processing of biosolids through bioaugmentation of anaerobic digestion.  
654 *Water Science and Technology* 57(4):589-594 doi:10.2166/wst.2008.008  
655 Venkiteswaran K, Bocher B, Maki J, Zitomer D (2016) Relating Anaerobic Digestion  
656 Microbial Community and Process Function. *Microbiology insights* 8(Suppl 2):37-44  
657 doi:10.4137/MBI.S33593  
658 Wang S, Hou X, Su H (2017) Exploration of the relationship between biogas production and  
659 microbial community under high salinity conditions. *Scientific Reports* 7:1149  
660 doi:10.1038/s41598-017-01298-y  
661 Westerholm M, Schnürer A (2019) Microbial Responses to Different Operating Practices for  
662 Biogas Production Systems Biogas [Working Title]. IntechOpen  
663 Zhang W, Werner JJ, Agler MT, Angenent LT (2014) Substrate type drives variation in reactor  
664 microbiomes of anaerobic digesters. *Bioresour Technol* 151:397-401  
665 doi:10.1016/j.biortech.2013.10.004  
666 Zhang Y, Alam MA, Kong X, Wang Z, Li L, Sun Y, Qi W (2017a) Effect of salinity on the  
667 microbial community and performance on anaerobic digestion of marine macroalgae,  
668 Zhang Y, Li L, Kong X, Zhen F, Wang Z, Sun Y, Dong P, Lv P (2017b) Inhibition Effect of

669 Sodium Concentrations on the Anaerobic Digestion Performance of *Sargassum* Species.  
670 Energy & Fuels 31(7):7101-7109 doi:10.1021/acs.energyfuels.7b00557  
671  
672

673 **Tables:**

674 **Table 1** Characteristics of the inoculum sludge (n=3). TSS = total suspended solids, VSS =

675 volatile suspended solids, COD = chemical oxygen demand, TAN = total ammonia nitrogen,

676 VFA = volatile fatty acids, FA = free ammonia nitrogen.

| Parameter       | Unit                   | Inoculum    |
|-----------------|------------------------|-------------|
| pH              | -                      | 7.57 ± 0.03 |
| TSS             | g TSS L <sup>-1</sup>  | 50.1 ± 0.1  |
| VSS             | g VSS L <sup>-1</sup>  | 26.6 ± 0.2  |
| Conductivity    | mS cm <sup>-1</sup>    | 8.13 ± 0.11 |
| Total VFA       | mg COD L <sup>-1</sup> | 0 ± 0       |
| TAN             | mg N L <sup>-1</sup>   | 1147 ± 23   |
| Na <sup>+</sup> | mg L <sup>-1</sup>     | 156 ± 22    |
| K <sup>+</sup>  | mg L <sup>-1</sup>     | 219 ± 20    |
| FA <sup>1</sup> | mg N L <sup>-1</sup>   | 43 ± 1      |

677 <sup>1</sup>The free ammonia (FA) content was calculated based on the TAN concentration, pH and

678 temperature in the full-scale installation (Anthonisen et al. 1976).

679

680 **Table 2** Characteristics of the two batches of waste activated sludge (n=3). TS = total solids,  
 681 VS = volatile solids, COD = chemical oxygen demand, VFA = volatile fatty acids, TAN = total  
 682 ammonia nitrogen, TKN = Kjeldahl nitrogen, FW = fresh weight.

| Parameter       | Unit                                | WAS1        | WAS2        |
|-----------------|-------------------------------------|-------------|-------------|
| pH              | -                                   | 7.04 ± 0.01 | 6.37 ± 0.02 |
| TS              | g TS kg <sup>-1</sup> FW            | 76.2 ± 0.9  | 54.3 ± 0.1  |
| VS              | g VS kg <sup>-1</sup> FW            | 44.2 ± 0.7  | 33.6 ± 0.1  |
| Total COD       | g COD kg <sup>-1</sup> FW           | 74.4 ± 9.3  | 44.7 ± 1.1  |
| Conductivity    | mS cm <sup>-1</sup>                 | 4.69 ± 0.01 | 4.30 ± 0.01 |
| Total VFA       | g COD kg <sup>-1</sup> FW           | 0 ± 0       | 0 ± 0       |
| TAN             | mg N kg <sup>-1</sup> FW            | 345 ± 13    | 571 ± 7     |
| Na <sup>+</sup> | mg Na <sup>+</sup> kg <sup>-1</sup> | 173 ± 44    | 67 ± 17     |
| K <sup>+</sup>  | mg K <sup>+</sup> kg <sup>-1</sup>  | 164 ± 1     | 183 ± 3     |
| TKN             | mg N kg <sup>-1</sup> FW            | 4121 ± 630  | 3321 ± 247  |
| COD:N ratio     | -                                   | 18.1 ± 3.6  | 13.5 ± 1.1  |
| TS:VS ratio     | -                                   | 1.72 ± 0.03 | 1.62 ± 0.01 |
| COD:VS ratio    | -                                   | 1.68 ± 0.21 | 1.33 ± 0.03 |

683

684 **Table 3** Overview of different phases of the experiment. OLR = Organic loading rate. HRT =  
685 Hydraulic retention time. During Phase 1 the first batch of waste activated sludge (WAS1) was  
686 used, while during Phase 2 the second batch of waste active sludge (WAS2) was used, hence,  
687 the difference in OLR.

| Phase    | Period      | OLR (g COD L <sup>-1</sup> d <sup>-1</sup> ) | HRT (days) |
|----------|-------------|----------------------------------------------|------------|
| Start-up | Day 0-12    | 0.94                                         | 40         |
|          | Day 13-26   | 1.88                                         | 20         |
| Phase 1  | Day 27-126  | 3.75                                         | 10         |
| Phase 2  | Day 126-207 | 4.47                                         | 10         |

688

689 **Figures:**

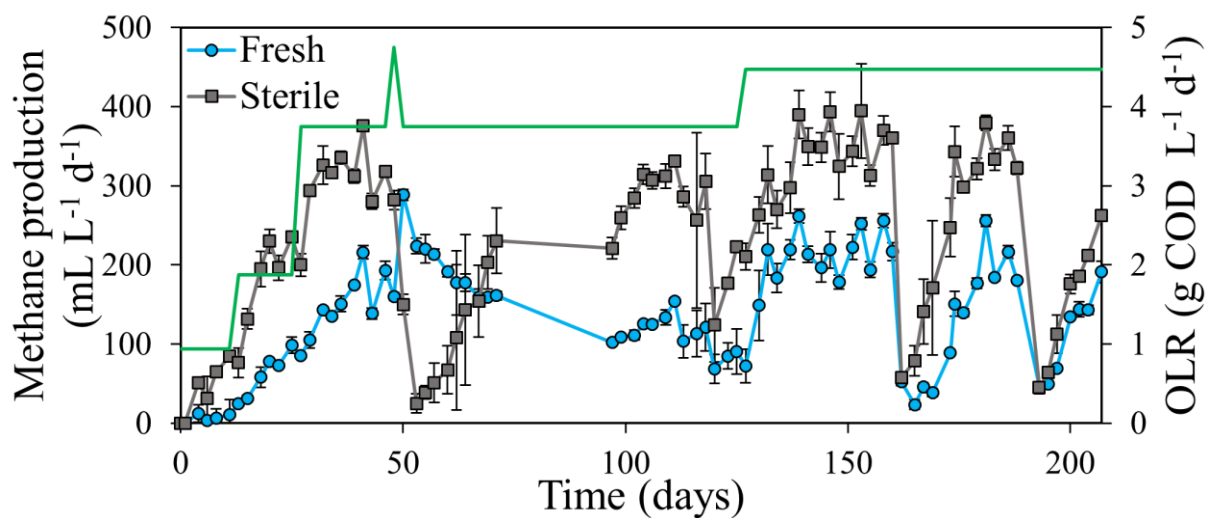

690

691 **Figure 1** Methane production in function of time in the digesters fed fresh and sterile waste  
692 activated sludge. Average values of the biological replicates (n=3) are presented, and the error  
693 bars represent standard deviations. The green line represents the organic loading rate (OLR).

694

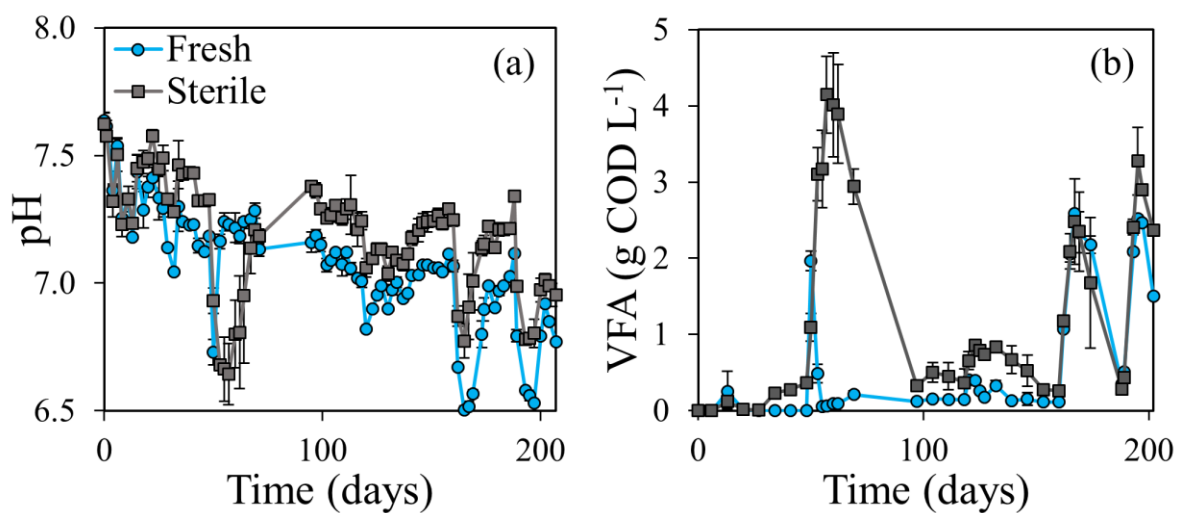

695

696 **Figure 2** pH (a) and total volatile fatty acid (VFA) concentration (b) in function of time in the  
697 digesters fed fresh and sterile waste activated sludge. Average values of the biological replicates  
698 (n=3) are presented, and the error bars represent standard deviations.

699



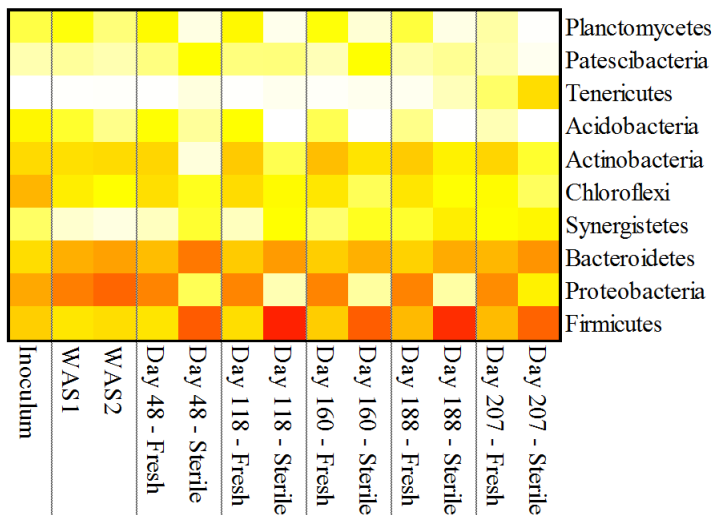

700

701 **Figure 3** Heatmap showing the relative abundance of the bacterial community at the phylum  
702 level in the inoculum, two batches waste activated sludge (WAS1 & 2) and in the digesters fed  
703 fresh and sterile waste activated sludge on day 48, 118, 160, 188 and 207. Weighted average  
704 values of the biological replicates (n=3) are presented. Only those phyla with at least 1 %  
705 relative in one of the samples are included. The colour scale ranges from 0 (white) to 60% (red)  
706 relative abundance.

707

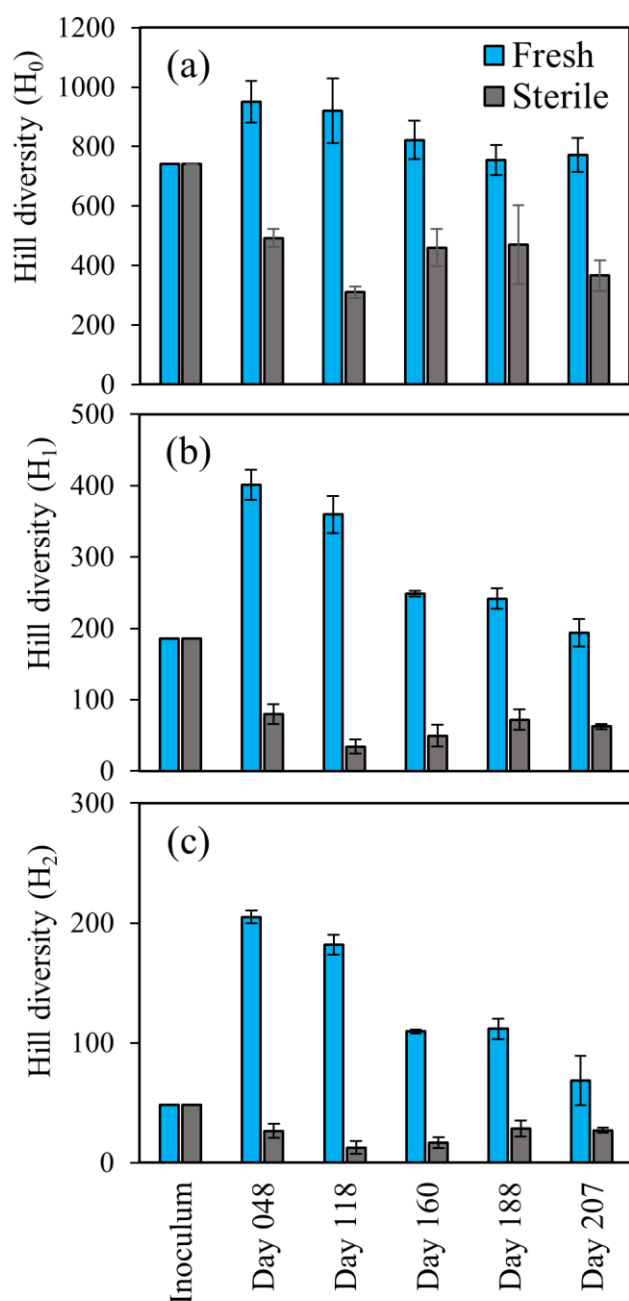

708

709 **Figure 4** Alpha diversity of the inoculum and in the digesters fed fresh and sterile waste

710 activated sludge on day 48, 118, 160, 188 and 207. The three Hill order diversity numbers (a)

711  $H_0$  (richness, number of OTUs), (b)  $H_1$  (exponential value of the Shannon index) and (c)  $H_2$

712 (inverse Simpson index) were calculated based at the OTU level. Error bars represent standard

713 deviations of the biological replicates (n=3).

714

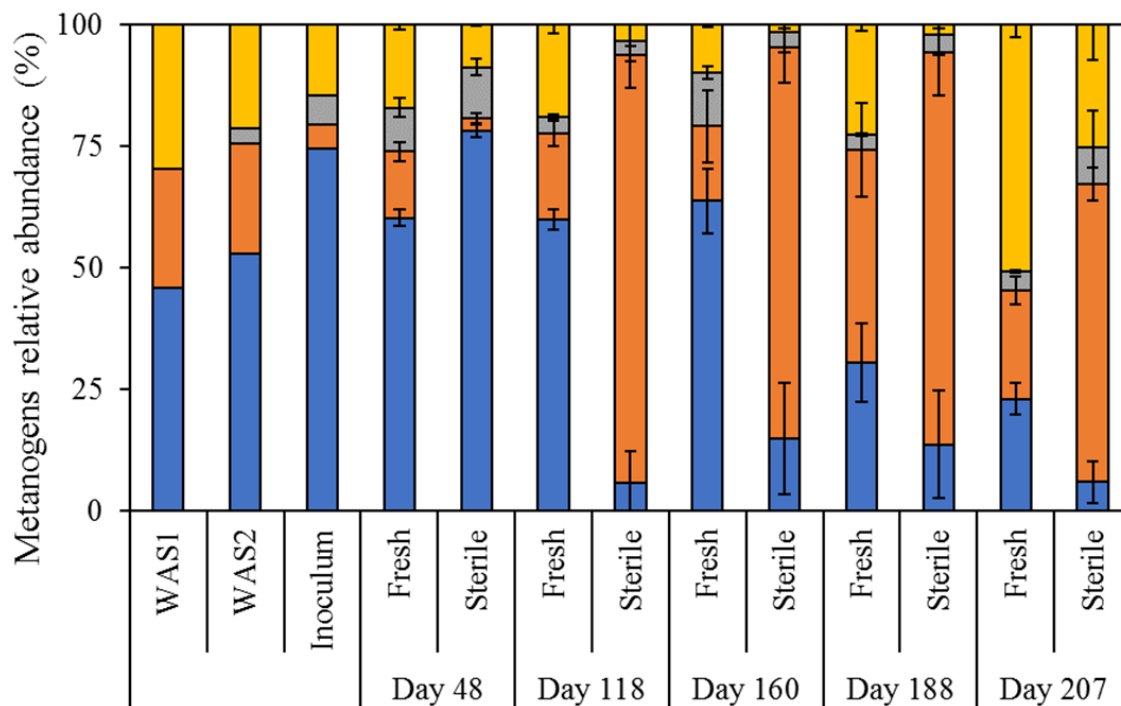

715

716 **Figure 5** Relative abundance (%) of the *Methanosaetaceae* (blue, ■), *Methanosarcinaceae*  
717 (orange, ■), *Methanobacteriales* (grey, ■) and *Methanomicrobiales* (yellow, ■) in the  
718 methanogenic community of the two batches waste activated sludge (WAS1 & 2), the inoculum  
719 and in the digesters fed fresh and sterile waste activated sludge on day 48, 118, 160, 188 and  
720 207. Average values of the biological replicates (n=3) are presented, and the error bars represent  
721 standard deviations.
